# Supplementary material
Source: Springer Nature journal article supplement (https://www.springermedizin.de/resource/supplementary/12913_2008_902_MOESM1_ESM.pdf/9536412)
Supplement: MOESM1 [file 9536412]

QCs asked to participate in the WIDA-trial  
n=169

QCs refused to participate in the WIDA trial  
n=143

QCs participating in the WIDA trial  
n=26

physicians given questionnaires in a dementia learning session during the WIDA trial  
n=449

physicians not given back the questionnaire  
n=185

physicians participating  
n=264 (response rate: 58,8%)
